# Supplementary material
Source: PubMed Central journal article supplement (PMC3087527)

**Figure S1. Recovery and inactivation of mFVIIa, mFVIIa-VEAY and mFVIIa-DVQ**

Recovery of mFVIIa, mFVIIa-DVQ or mFVIIa-VEAY was determined as follows: 1 µg/ml of recombinant protein was added to hemophilia A (HA) or B (HB) mouse or human plasma at room temperature and residual activity was determined at defined timepoints by aPTT, using a standard curve of plasma spiked with mFVIIa, mFVIIa-DVQ or mFVIIa-VEAY. Briefly, 25 µl of sample were incubated with an equal volume of aPTT reagent (Trinity Biotech, Co Wicklow, Ireland) for 3 min at 37° C, followed by the addition of 25 µl (for mouse plasmas) or 50 µl (for human plasmas) of 25 mM CaCl<sub>2</sub> prior to measuring the time to clot using a Start4 instrument (Diagnostica Stago, Parsippany, NJ). For determining the effect of antithrombin in residual activity, we used human antithrombin (AT)-deficient plasma (Affinity Biologicals, Ontario, Canada), 5 µg/ml of mFVIIa-VEAY and mFVIIa-DVQ and 50 µl of 25 mM CaCl<sub>2</sub> were used. The use of 5 µg/ml of each variant was necessary to reduce the initial clot times so that changes as a result of inactivation could be easily monitored. The graphs depict residual activity of mFVIIa, mFVIIa-VEAY and mFVIIa-DVQ following addition of 1µg/ml of recombinant protein in mouse hemophilia A (A) or B (B) plasma. Data were derived from at least 2 independent experiments and an asterisk denotes  $P < .05$  (mFVIIa-DVQ) or  $P < .01$  (mFVIIa-VEAY) compared to mFVIIa. (C) Clotting time (aPTT) following addition of 5 µg/ml of mFVIIa-VEAY and mFVIIa-DVQ in human AT deficient plasma. A grey box indicates the range of aPTT of human AT deficient plasma without the addition of protein. Data were derived from 3 independent experiments. All data and error bars are shown as average  $\pm$  1 standard deviation, respectively.

**Figure S2. RNA from snap-frozen liver samples collected after week 14 post AAV administration was extracted using the RNeasy kit (Qiagen Inc., Valencia, CA)**

Following reverse transcription of 100 ng of total RNA (Superscript III kit, Invitrogen), transcript levels for mFVII/mFVIIa/mFVIIa-VEAY were quantified with real-time PCR using appropriate primers (SABiosciences, Frederick, MD) and corrected for endogenous GAPDH transcript levels (Applied Biosystems, Foster City, CA). Both mFVIIa and mFVIIa-VEAY exhibited similar rates of amplification in real-time PCR. Three groups of mice are shown: untreated hemophilia A mice (HA), AAV-mFVIIa treated HA (HA-mFVIIa) and HA mice treated with low dose AAV-mFVIIa-VEAY (HA-mFVIIa-VEAY Low). Data are shown as mean  $\pm$  1 standard deviation (SD) of individual mice. Asterisk denotes  $P < .007$  relative to HA mice treated with AAV-mFVIIa (HA-mFVIIa). Fold difference between HA-mFVIIa and HA-mFVIIa-VEAY (Low) is shown.

Figure S1

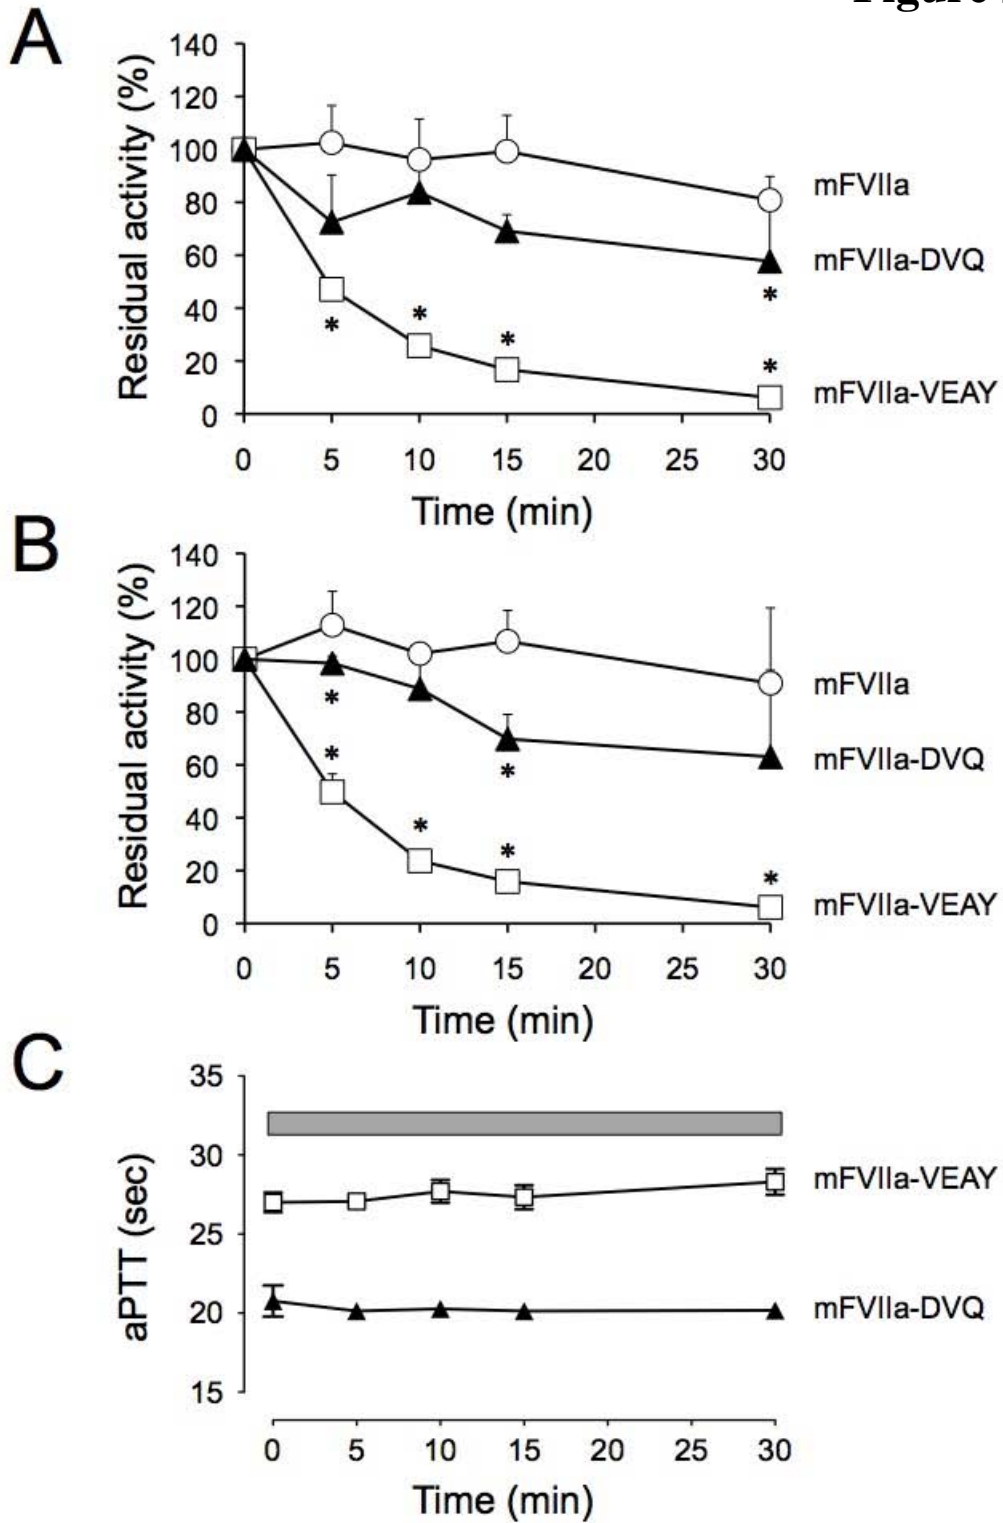

**Figure S2**

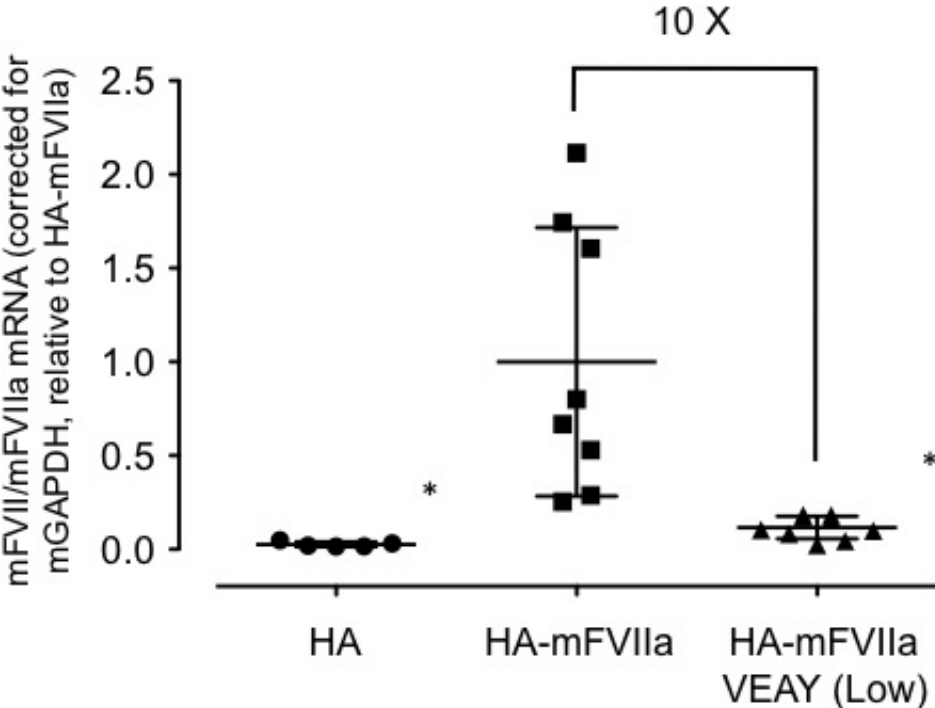

Supplement: supp_blood-2010-09-309732_Document1.pdf [file supp_blood-2010-09-309732_Document1.pdf]
